# Supplementary material for: Habitual alcohol consumption associated with reduced semen quality and changes in reproductive hormones; a cross-sectional study among 1221 young Danish men
Source: HighWire-hosted journal article supplement (doi:10.1136/bmjopen-2014-005462), 2014-09-01
Supplement: bmjopen-2014-005462supp.pdf [file bmjopen-2014-005462supp.pdf]

**Supplementary table** Information (%) obtained from questionnaires and physical examination according to typical alcohol intake and bingeing among healthy, young Danish men.

| Variable distribution in percent                           | N   | %  | Alcohol intake<br>(units /week)<br>N=553                |                |             | Number of binge episodes<br>during the past 30 days <sup>a</sup><br>N=1,221 |              |             |
|------------------------------------------------------------|-----|----|---------------------------------------------------------|----------------|-------------|-----------------------------------------------------------------------------|--------------|-------------|
|                                                            |     |    | 0-15<br>N=369                                           | 16-30<br>N=138 | >30<br>N=46 | 0-2<br>N=431                                                                | 3-9<br>N=673 | >10<br>N=92 |
|                                                            |     |    | <b>Information obtained at the physical examination</b> |                |             |                                                                             |              |             |
| Season of examination between October and March            | 315 | 57 | 58                                                      | 57             | 54          | 57                                                                          | 58           | 58          |
| Varicocele found at the physical examinations <sup>b</sup> | 40  | 7  | 7                                                       | 8              | 7           | 8                                                                           | 9            | 8           |
| Fever above 38°C within the last 3 months                  | 31  | 6  | 4                                                       | 11             | 10*         | 7                                                                           | 7            | 8           |
| BMI (kg/m <sup>2</sup> )                                   |     |    |                                                         |                |             |                                                                             |              |             |
| < 20                                                       | 111 | 20 | 22                                                      | 15             | 20          | 20                                                                          | 16           | 13          |
| 20 – 24.99                                                 | 327 | 60 | 56                                                      | 67             | 61          | 62                                                                          | 66           | 70          |
| ≥ 25                                                       | 112 | 20 | 21                                                      | 18             | 20          | 19                                                                          | 18           | 17          |
| <b>Information obtained from questionnaire</b>             |     |    |                                                         |                |             |                                                                             |              |             |
| Above 20 years of age at time of examination               | 134 | 24 | 27                                                      | 20             | 15*         | 31                                                                          | 17           | 14*         |
| Physical activity 400 ≥ Watt per week                      | 547 | 45 | 45                                                      | 42             | 41          | 46                                                                          | 44           | 45          |
| Total caffeine intake >300 (mg/day)                        | 284 | 23 | 22                                                      | 24             | 33          | 22                                                                          | 22           | 27          |
| Maternal education                                         |     |    |                                                         |                |             |                                                                             |              |             |
| <9 years                                                   | 17  | 3  | 5                                                       | 2              | 0*          | 7                                                                           | 2            | 0*          |
| 9-10 years                                                 | 104 | 22 | 24                                                      | 17             | 18          | 25                                                                          | 20           | 15          |
| >10 years                                                  | 362 | 75 | 71                                                      | 81             | 82          | 68                                                                          | 78           | 86          |
| Current smoking                                            | 252 | 46 | 36                                                      | 61             | 76*         | 31                                                                          | 54           | 74*         |
| Exposure to mother's smoking in utero                      | 136 | 25 | 27                                                      | 29             | 28          | 22                                                                          | 27           | 25          |
| Self-reported genital conditions <sup>c</sup>              | 37  | 7  | 6                                                       | 7              | 13          | 6                                                                           | 6            | 9           |
| Sexual transmitted diseases <sup>d</sup>                   | 60  | 11 | 8                                                       | 12             | 33*         | 9                                                                           | 10           | 13          |
| Born with cryptorchidism <sup>e</sup>                      | 31  | 6  | 5                                                       | 6              | 9           | 7                                                                           | 6            | 2           |
| Number of binge episodes during the past 30 days           |     |    |                                                         |                |             |                                                                             |              |             |
| 0                                                          | 176 | 15 | 23                                                      | 0              | 1           | 100                                                                         | 0            | 0           |
| 1-2                                                        | 255 | 21 | 31                                                      | 5              | 2           | 100                                                                         | 0            | 0           |
| 3-5                                                        | 415 | 35 | 33                                                      | 45             | 25          | 0                                                                           | 100          | 0           |
| 6-9                                                        | 258 | 22 | 11                                                      | 39             | 43          | 0                                                                           | 100          | 0           |
| >9                                                         | 92  | 8  | 3                                                       | 10             | 29          | 0                                                                           | 0            | 100         |

<sup>a</sup>Binging defined as alcohol intake for more than 5 units on one occasion.

<sup>b</sup> Varicocele grade 2 or 3 found at physical examination.

<sup>c</sup> Self-reported information about torsion of testes, epididymitis or inguinal hernia.

<sup>d</sup> Sexually transmitted diseases; gonorrhea and chlamydia.

<sup>e</sup> If information was missing the man was categorized as not having cryptorchidism.

\* p<0.05 by chi-square test.
